# Supplementary material for: Comprehensive Characterization of Chemical Composition and Antioxidant Activity of Lignan-Rich Coniferous Knotwood Extractives
Source: MDPI journal article supplement (doi:10.3390/antiox11122338), 2022-11-25
Supplement: s1 [file s1]

## Supplementary material

# Comprehensive Characterization of Chemical Composition and Antioxidant Activity of Lignan-rich Coniferous Knotwood Extractives

### Contents:

**Figure S1.** Areas of trees harvesting in the Arkhangelsk region of Russia.

**Figure S2.** An example of 2D-NMR workflow for unknown compound structure elucidation in complex mixture using ACD/Labs expert system.

**Figure S3.** Tandem mass spectra of the major lignans in knotwood extracts and assignment of the product ions (A – hydroxymatairesinol; B – secoisolariciresinol; C – nortrachelogenin).

**Figure S4.** HPLC-DAD chromatograms (280 nm) of the knotwood PLE extracts.

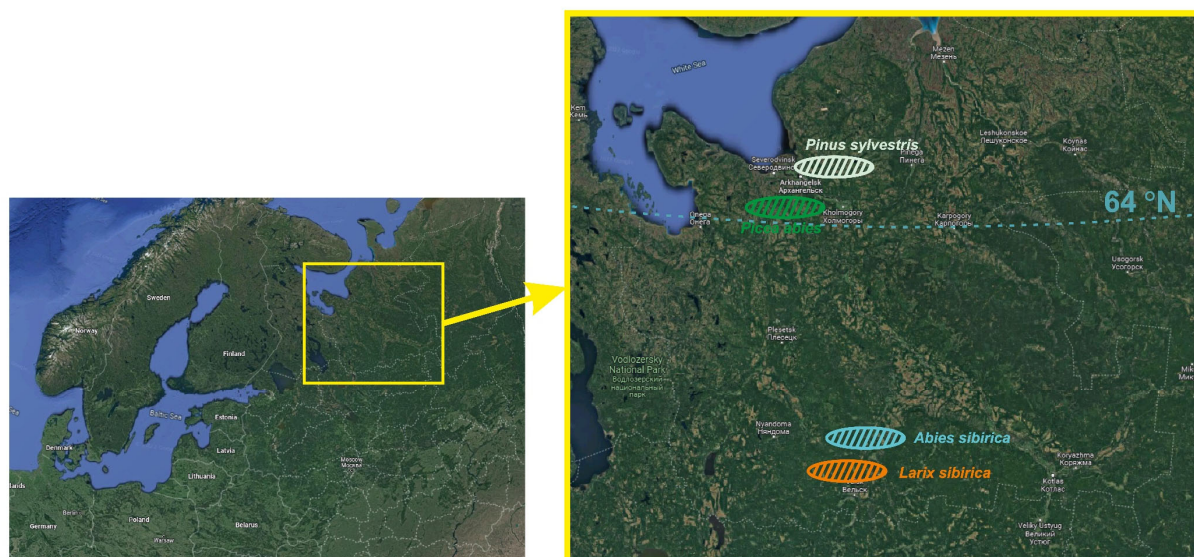

**Figure S1.** Areas of trees harvesting in the Arkhangelsk region of Russia



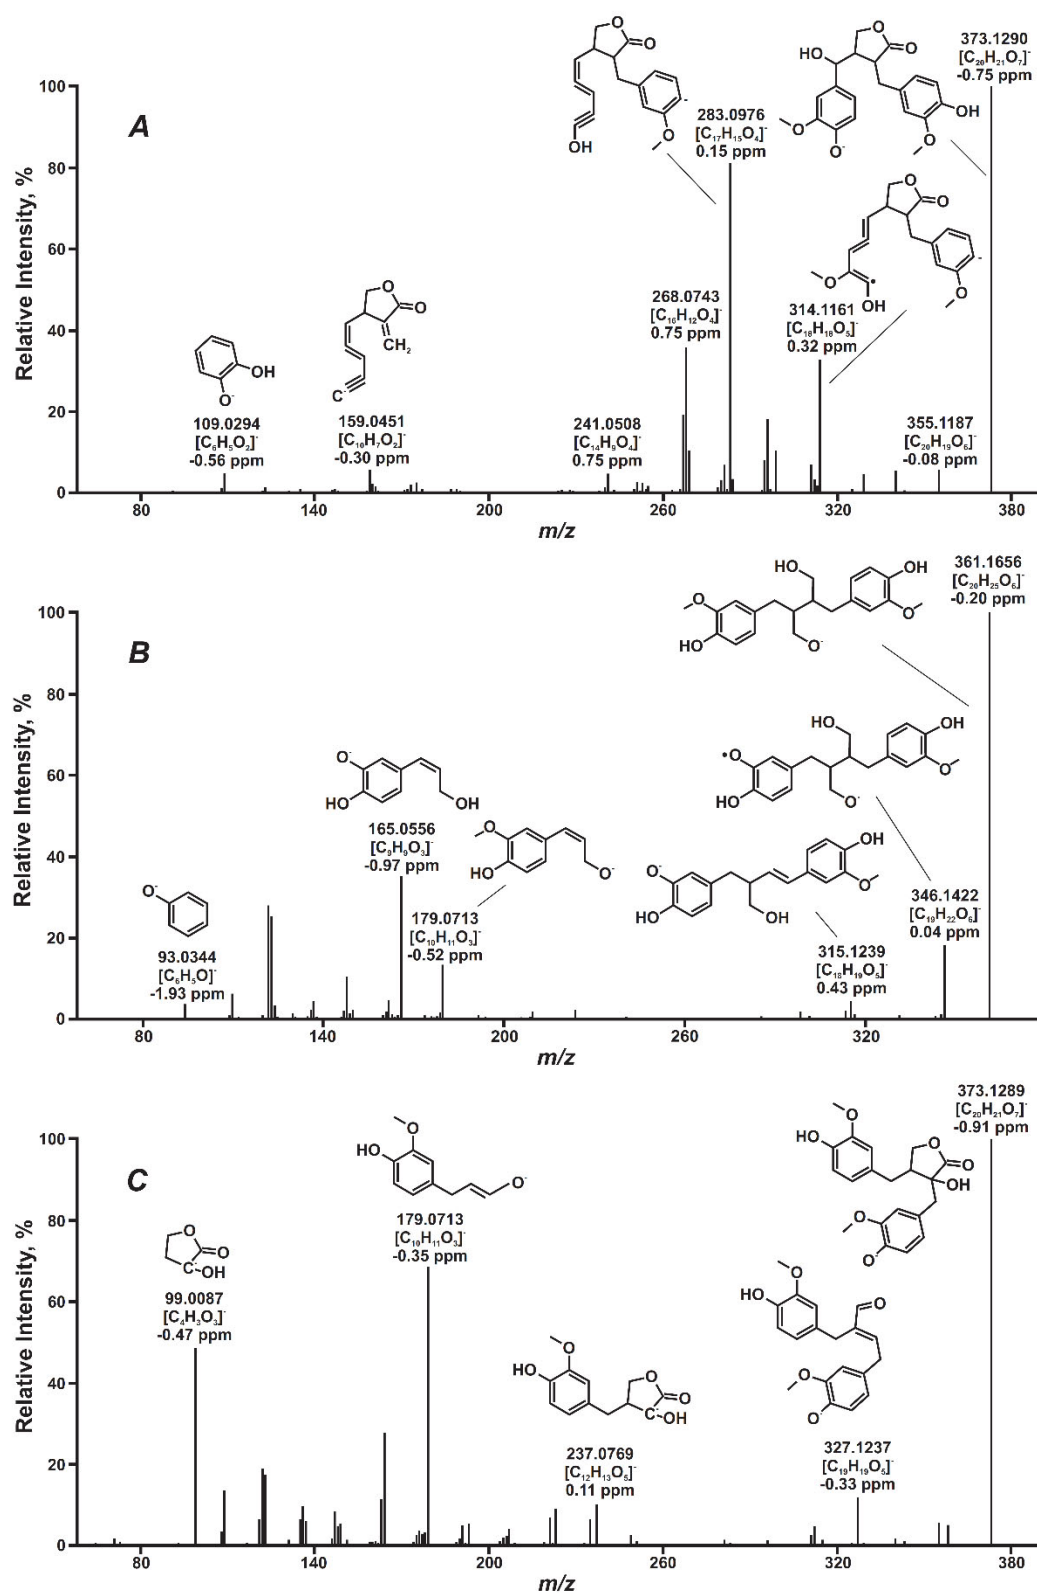

**Figure S3.** Tandem mass spectra of the major lignans in knotwood extracts and assignment of the product ions (A – hydroxymatairesinol; B – secoisolariciresinol; C – nortrachelogenin)

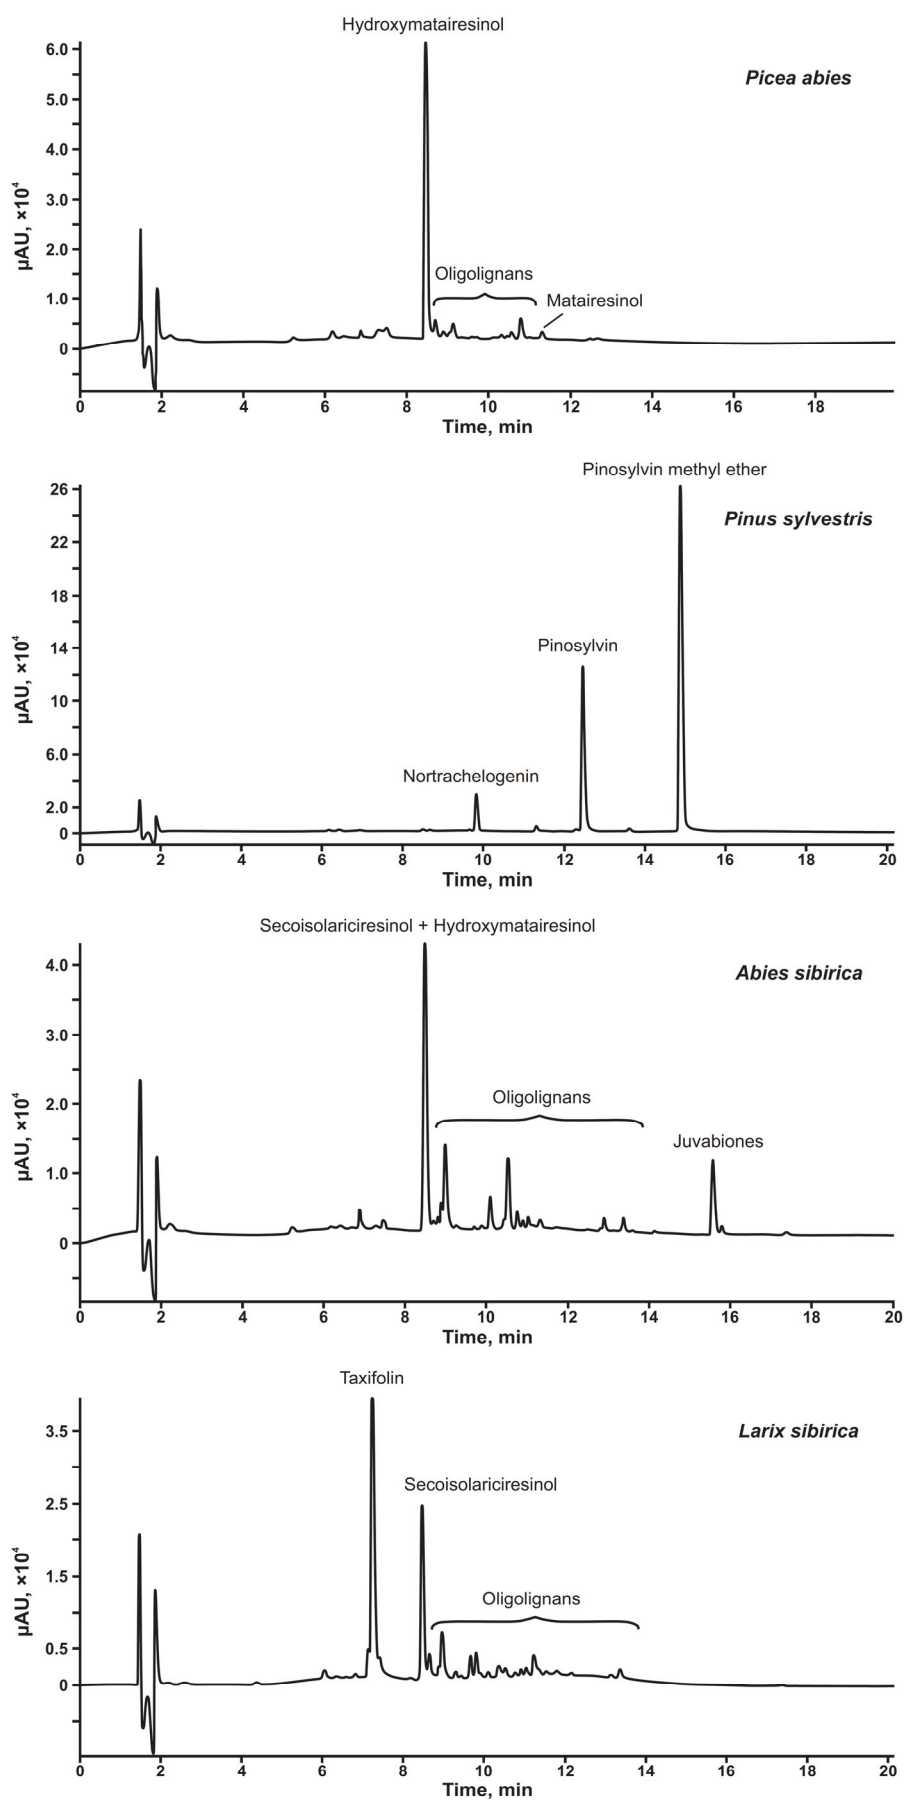

Figure S4. HPLC-DAD chromatograms (280 nm) of the knotwood PLE extracts
